# Supplementary material for: Demographic, Clinical, and Behavioral Factors Associated With Electronic Nicotine Delivery Systems Use in a Large Cohort in the United States
Source: PubMed Central journal article supplement — Tob Use Insights. 2023 Jan 5;16:1179173X221134855. doi: 10.1177/1179173X221134855 (PMC9829996; doi:10.1177/1179173x221134855), 2023-01-05
Supplement: sj-pdf-1-tui-10.1177_1179173X221134855.pdf [file sj-pdf-1-tui-10.1177_1179173X221134855.pdf]

**Supplemental Table 1. ICD-9 and ICD-10 diagnosis codes for each condition**

| <b>Diagnosis codes for history of each condition</b> |                                                                                       |                                          |
|------------------------------------------------------|---------------------------------------------------------------------------------------|------------------------------------------|
|                                                      | <b>ICD-9</b>                                                                          | <b>ICD-10</b>                            |
| <b>Heart attack</b>                                  | 410, 412 429.79                                                                       | I21, I22, I25.2                          |
| <b>Stroke</b>                                        | 430, 431, 432, 433.01, 433.11, 433.21, 433.31, 433.81, 433.91, 434.01, 434.11, 434.91 | I60, I61, I62, I63, G46.3, G46.3         |
| <b>Other cerebral vascular disease</b>               | 362.34, 435, 436, 437, 438                                                            | G45, H34.0, I64, I65, I66, I67, I68, I69 |
| <b>Asthma</b>                                        | 493, 648.9                                                                            | J45                                      |
| <b>Hypertension</b>                                  | 401, 402, 403, 404, 405                                                               | I10, I11, I12, I13, I14, I15, I16        |
| <b>Hyperlipidemia</b>                                | 272.4, 272.2                                                                          | E78.2, E78.4, E78.5                      |
| <b>Chronic obstructive pulmonary disease (COPD)</b>  | 491, 492, 496                                                                         | J41, J42, J43, J44                       |
| <b>Diagnosis codes for incident outcomes</b>         |                                                                                       |                                          |
| <b>Heart attack</b>                                  |                                                                                       | I21                                      |
| <b>Stroke</b>                                        |                                                                                       | I60, I61, I62, I63, G46.3, G46.3         |
| <b>Influenza</b>                                     |                                                                                       | J09, J10, J11                            |
| <b>Pneumonia</b>                                     |                                                                                       | J12, J13, J14, J15, J16, J17, J18        |
| <b>Asthma exacerbation</b>                           |                                                                                       | J45.21, J45.31, J45.41, J45.51I, J45.901 |

**Supplemental Table 2. Distribution of e-cigarette use, by fine strata of race and ethnicity**

|                                                  | <b>E-cig Never User</b> | <b>E-cig Former User</b> | <b>E-cig Current User</b> | <b>Total</b> |
|--------------------------------------------------|-------------------------|--------------------------|---------------------------|--------------|
| <b>Race/Ethnicity</b>                            |                         |                          |                           |              |
| <b>Non-Hispanic Black</b>                        |                         |                          |                           |              |
| African                                          | 525 (93.8%)             | 28 (5.0%)                | 7 (1.3%)                  | 560          |
| African American or Black                        | 5772 (91.6%)            | 430 (6.8%)               | 102 (1.6%)                | 6304         |
| Afro-Caribbean                                   | 351 (93.4%)             | 20 (5.3%)                | 5 (1.3%)                  | 376          |
|                                                  |                         |                          |                           |              |
| <b>Non-Hispanic White</b>                        |                         |                          |                           |              |
| Ashkenazi Jewish                                 | 3081 (95.6%)            | 107 (3.3%)               | 34 (1.1%)                 | 3222         |
| Middle Eastern                                   | 751 (86.9%)             | 91 (10.5%)               | 22 (2.6%)                 | 864          |
| White or European-American                       | 83414 (94.3%)           | 3881 (4.4%)              | 1139 (1.3%)               | 88434        |
|                                                  |                         |                          |                           |              |
| <b>Hispanic</b>                                  |                         |                          |                           |              |
| Central/South American                           | 1200 (91.1%)            | 95 (7.2%)                | 22 (1.7%)                 | 1317         |
| Cuban                                            | 217 (91.6%)             | 10 (4.2%)                | 10 (4.2%)                 | 237          |
| Mexican                                          | 6521 (90.2%)            | 591 (8.2%)               | 118 (1.6%)                | 7230         |
| Puerto Rican                                     | 620 (88.8%)             | 62 (8.9%)                | 16 (2.3%)                 | 698          |
| Other Latino/Hispanic                            | 3669 (90.5%)            | 309 (7.6%)               | 76 (1.9%)                 | 4054         |
|                                                  |                         |                          |                           |              |
| <b>Asian</b>                                     |                         |                          |                           |              |
| Chinese                                          | 3745 (94.5%)            | 172 (4.3%)               | 45 (1.1%)                 | 3962         |
| Filipino                                         | 2345 (87.4%)            | 271 (10.1%)              | 67 (2.5%)                 | 2683         |
| Japanese                                         | 2552 (93.3%)            | 140 (5.1%)               | 42 (1.5%)                 | 2734         |
| Korean                                           | 515 (89.3%)             | 42 (7.3%)                | 20 (3.5%)                 | 577          |
| Vietnamese                                       | 653 (90.7%)             | 47 (6.5%)                | 20 (2.8%)                 | 720          |
| Other Southeast Asian (Cambodian, Laotian, etc_) | 351 (90.2%)             | 32 (8.2%)                | 6 (1.5%)                  | 389          |
| South Asian (Indian, Pakistani, etc_)            | 1746 (95.6%)            | 66 (3.6%)                | 15 (0.8%)                 | 1827         |
|                                                  |                         |                          |                           |              |
| <b>Native Hawaiian / Other Pacific Islanders</b> |                         |                          |                           |              |
| Native Hawaiian                                  | 507 (89.6%)             | 47 (8.3%)                | 12 (2.1%)                 | 566          |
| Other Pacific Islander                           | 825 (89.2%)             | 74 (8.0%)                | 26 (2.8%)                 | 925          |
|                                                  |                         |                          |                           |              |
| <b>Native American Indian or Alaska Native</b>   |                         |                          |                           |              |
|                                                  | 2865 (88.6%)            | 294 (9.1%)               | 76 (2.4%)                 | 3235         |

Note: Supplemental Table 2 allows for the same individual to count in multiple racial and ethnic categories, if an individual selected multiple categories of self-reported race and ethnicity. Those who selected “Prefer not to answer” for self-reported race and ethnicity or who left this question blank were excluded from Supplemental Table 2 (n=791).
